# Supplementary material
Source: PubMed Central journal article supplement (PMC2878493)
Supplement: supp_M109.077016_jbc.M109.077016-1.pdf [file supp_M109.077016_jbc.M109.077016-1.pdf]

# Supplemental figure

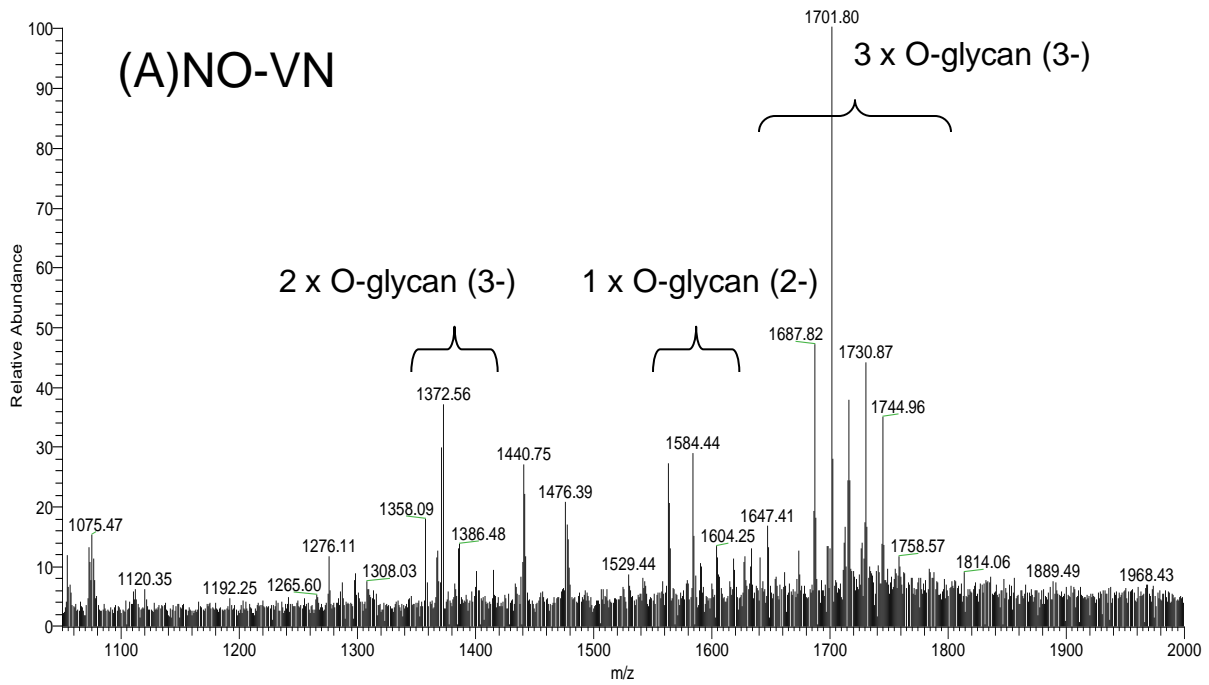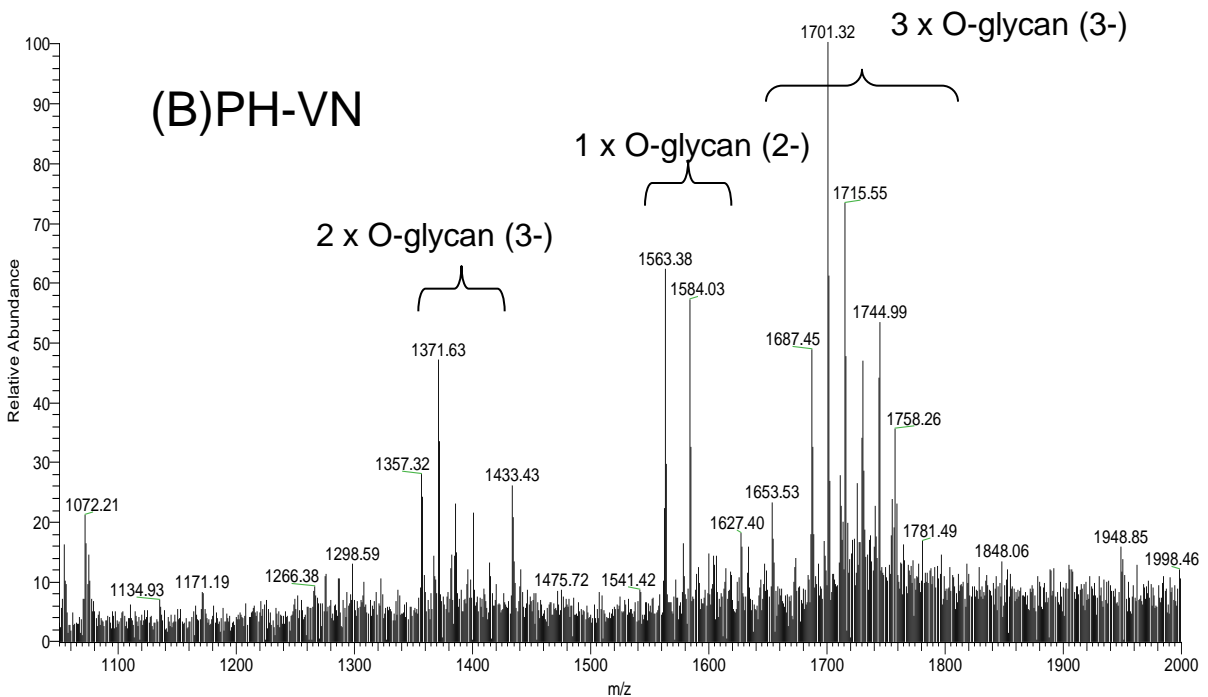

Mass spectra of O-glycosylated peptides containing Ser/Thr 110-124 in NO- (A) and PH-VN (B). The ratios of relative abundance of peptides that have three O-glycans was decreased in PH-VN and consequently those with fewer O-glycosylated peptides were increased.
